# Supplementary material
Source: PubMed Central journal article supplement (PMC6724726)
Supplement: NIHMS1040988-supplement-Supplemental.pdf [file NIHMS1040988-supplement-Supplemental.pdf]

## **Supporting Information for**

### **Engineered production of hapalindole alkaloids in the cyanobacterium *Synechococcus* sp. UTEX 2973**

Cory J. Knoot<sup>a</sup>, Yogan Khatri<sup>b</sup>, Robert M. Hohlman<sup>b</sup>, David H. Sherman<sup>b</sup>, and Himadri B.  
Pakrasi<sup>a</sup>

<sup>a</sup> Department of Biology, Washington University, St. Louis, Missouri, USA

<sup>b</sup> Life Sciences Institute, University of Michigan, Ann Arbor, MI, USA

## Supplementary Methods

**Sequences of synthesized DNA fragments for pSL3228 assembly.** The *P<sub>J23119</sub>* and *lacI* W220F coding sequence were synthesized with terminal overlaps for Gibson assembly. Sequence:

gagcagaagaggctactaggtaggatcaaaaataatcaagagggcaaaaaactcaatttggtatcaaaaatgaagag  
tatttgagttcgtgcagaataggaataactaaggaattcttgacagctagctcagtcctaggtataatgctagcatctatactg  
gaagagagtcaattcaggggtggtgaatgtgaaaccagtaacgttatacgatgtcgcagagtatgccgggtgtctcttatcag  
accgtttcccgctggtgaaccaggccagccacgtttctgcgaaaacgcgggaaaaagtggaagcggcgatggcgga  
gctgaattacattccaaccgctggcacaacaactggcgggcaaacagtcgttgctgattggcgttgccacctccagtct  
ggcctgcacgcgcccgtcgaattgtcgcggcgattaaatctcgcgccgatcaactgggtgccagcgtgggtggtcgcg  
ggtagaacgaagcggcgctgaagcctgtaaagcggcggtgcacaatcttctcgcgcaacgcgctcagtggtgatcatt  
aactatccgctggatgaccaggatgccattgctgtggaagctgcctgcactaatgttccggcgttatttcttgatgtctctgacc  
agacacccatcaacagtatttttctcccatgaagacggtacgcgactgggctggagcatctggtcgcattgggtcacc  
agcaaatcgcgctgtagcgggcccattaagtctgtctcggcgcgctctcgcgctggctggctggcataaatactcactcgc  
aatcaaattcagccgatagcggaacgggaaggcgacttagtgccatgtccggtttcaacaacccatgcaaattgctgaa  
tgagggcatcgttcccactgcatgctggttgccaacgatcagatggcgcgcaatgctgcgccattaccgagtcgg  
ggctgcgcggtggtgcggatatctcggtagtggtgatacgcgataccgaagacagctcatgttatatcccgccgttaacca  
ccatcaaacaggattttcgcctgctggggcaaaccagcgtggaccgcttgcgcaactctctcagggccaggcgggtgaag  
ggcaatcagctgttggcgtctcactggtgaaaagaaaaaccacctggcgccaatacgaacccgctctccccgcg  
cgttgccgattcattaatgcagctggcacgcaggttcccgactggaaagcgggcagtgaaatctaaactaccgcatta  
aagctagacatggtacctaattcgacctgcaggag

The P<sub>trc2O</sub> promoter was synthesized with the following sequence:

```
ttgatcctacctagtagcctcttctgctcctgcagaattgtgagcgctcacaattgatattttggtctgtcgttgcgatcgcccggtt
gcaggccgacatgaaggattgacaattaatcatccggctcgtataatgaattgtgagcgctcacaattggtaccggtgata
ccgctaaggaggaagtgaccatgattagtgaaaaaattctc
```

**Extraction and detection of *L*-tryptophan.** SL3228 cells were cultured in a photobioreactor at 38 °C under 500  $\mu\text{E m}^{-2} \text{s}^{-1}$  while bubbling with 5% CO<sub>2</sub>-supplemented air. After three days of growth, the cells were harvested by centrifugation, washed with water, and cell pellets resuspended in 50 mM sodium acetate pH 4.8. The cells were then boiled for one hour and pelleted by centrifugation. The lysate was transferred to HPLC vials and analyzed using an Agilent 1200 series instrument equipped with a fluorescence detector. Extracts were loaded onto a 150 x 4.6 mm Phenomenex Luna 5  $\mu\text{m}$  C<sub>18</sub> column and separated using an isocratic mobile phase containing 85% 50 mM sodium acetate pH 4.8 and 15% acetonitrile. We tracked tryptophan fluorescence using an excitation wavelength of 287 nm and detection wavelength of 352 nm.

## Supplementary Figures

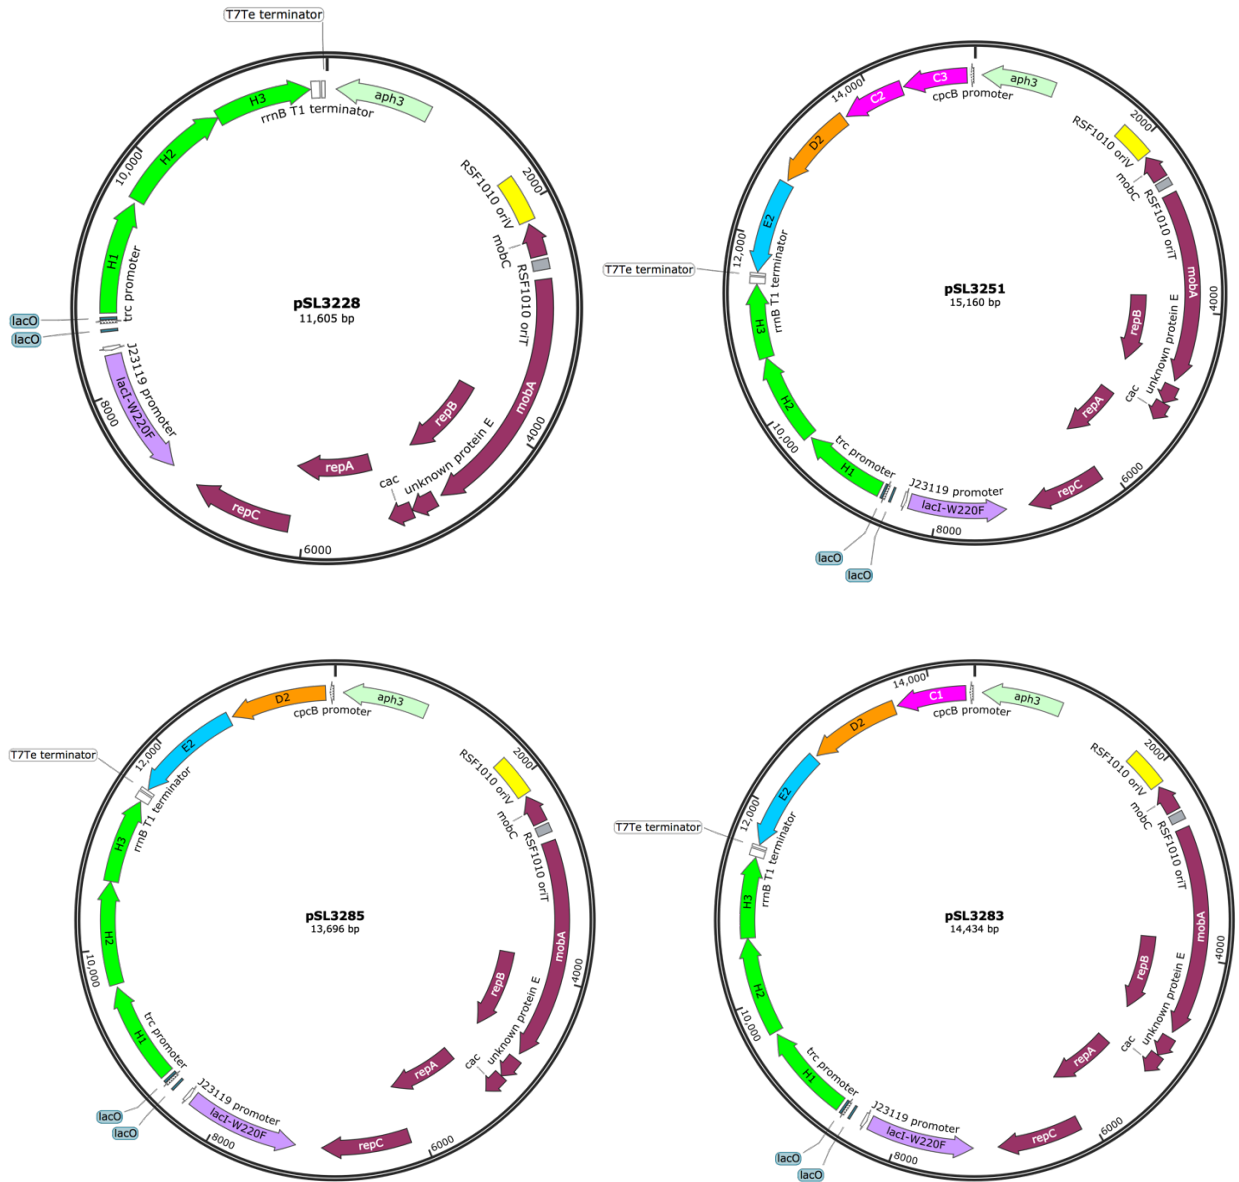

**Figure S1.** Maps of RSF1010-type plasmids used to express *fam* genes in S2973.

Genes are shown as arrows and genetic elements are labeled.

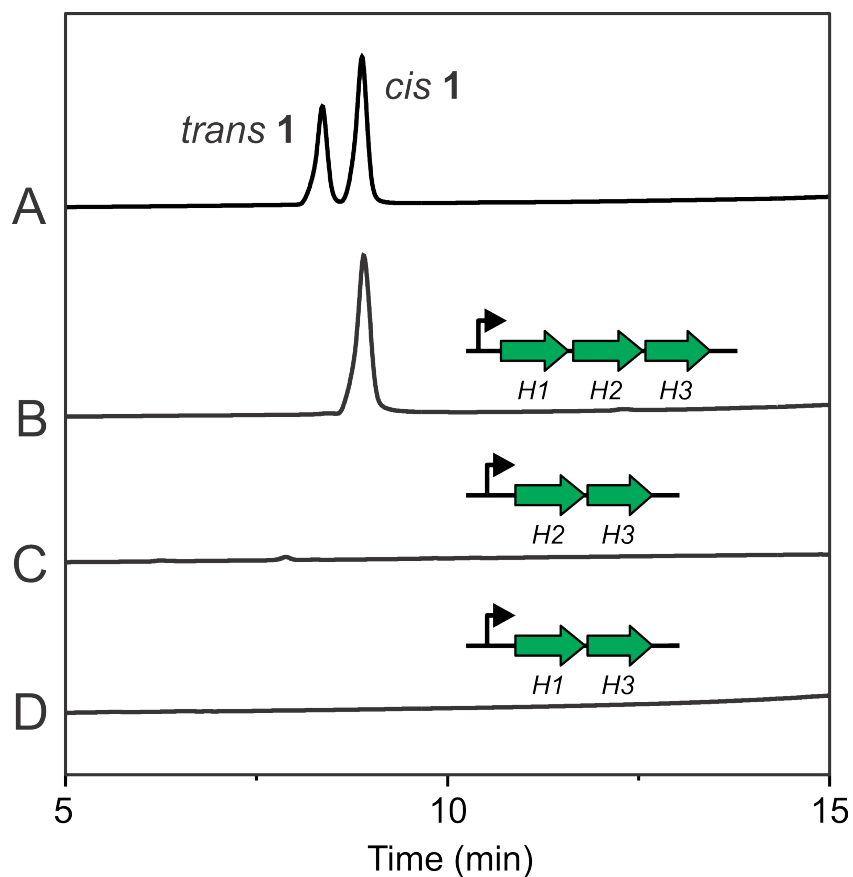

**Figure S2.** All three *famH* genes are necessary for the production of *cis* indole-isonitrile in S2973. The figure shows HPLC traces of organic S2973 extracts and standards monitored at 222 nm. (A) authentic *trans* and *cis* indole-isonitrile (**1**) standards. (B) S2973 expressing *famH1*, *famH2*, and *famH3* (SL3228). (C) S2973 expressing *famH2* and *famH3*. (D) S2973 expressing *famH1* and *famH3*. In B – D the *famH* operons are shown diagrammatically above the corresponding trace.

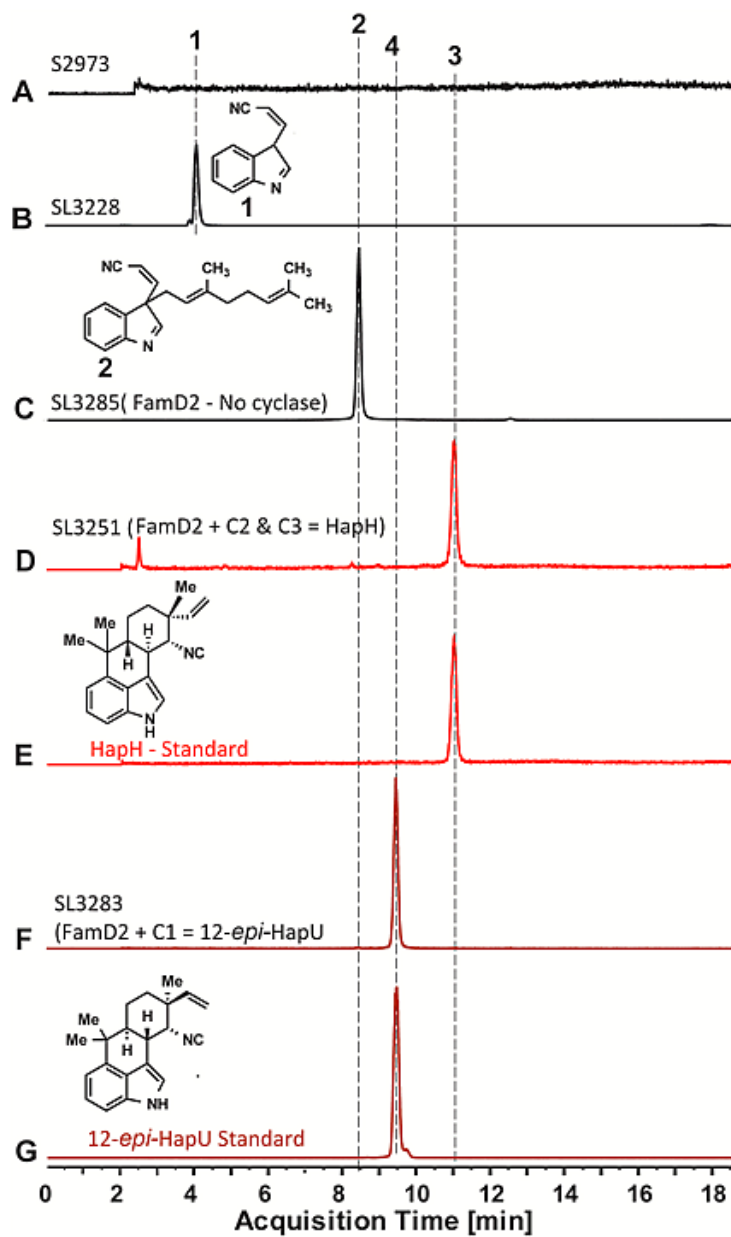

**Figure S3.** Extracted ion chromatograms (EICs) of S2973 extracts compared with authentic hapalindole standards. (A) Wild-type S2973 ( $m/z$  of 168). (B) SL3228 ( $m/z$  of 168). (C) SL3285 ( $m/z$  of 305). (D) SL3251 ( $m/z$  of 305). (E) Authentic hapalindole H (**3**,  $m/z$  of 305). (F) SL3283 ( $m/z$  of 305). (G) Authentic 12-*epi* hapalindole U (**4**,  $m/z$  of 305).

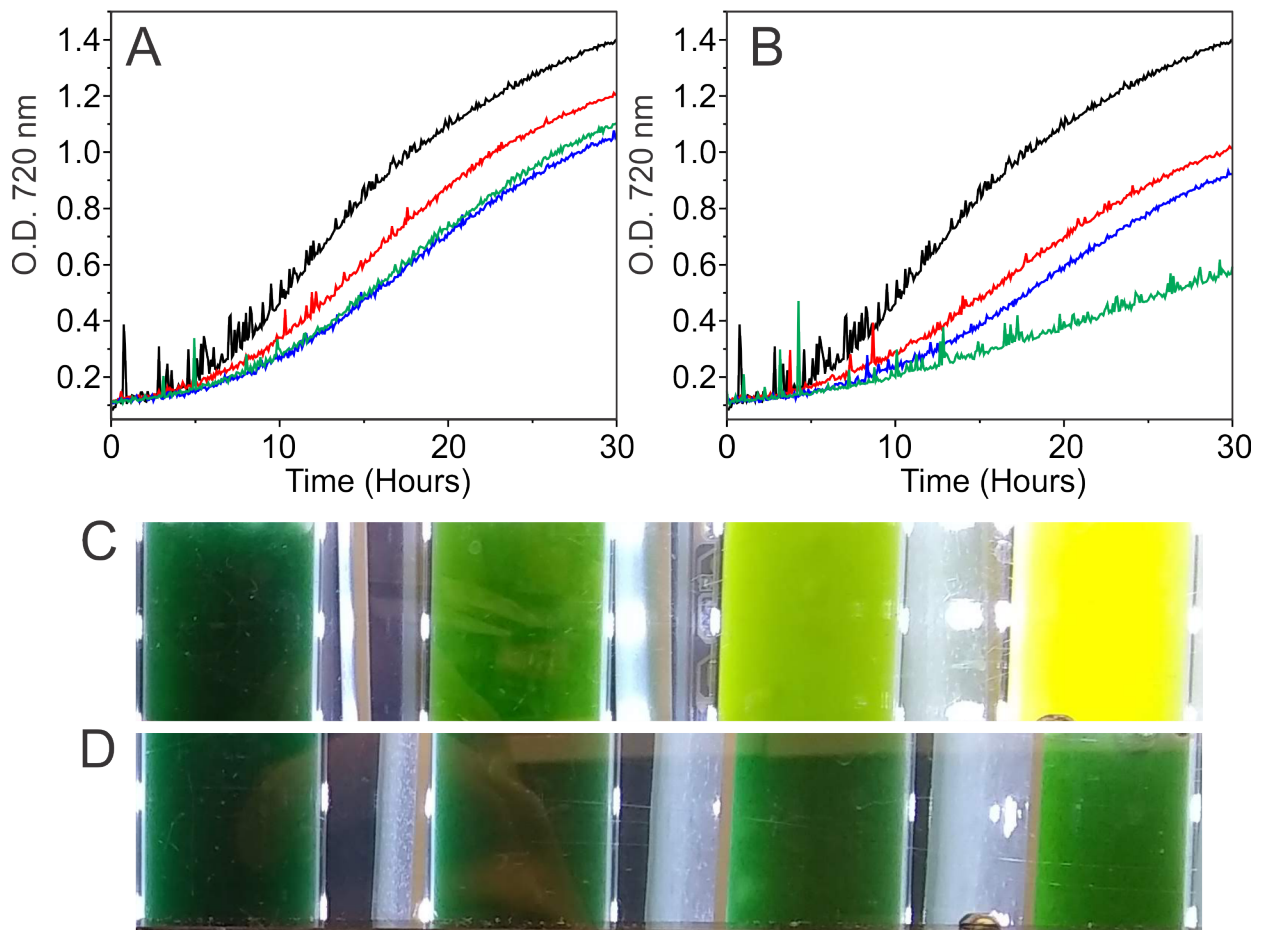

**Figure S4.** Representative growth curves of S2973 strains in a bioreactor monitored at 720 nm under uninduced (A) and induced with 75  $\mu\text{M}$  IPTG conditions (B). Strains are labeled with the following colors: black is a control strain with plasmid pSL3084, red is SL3251, blue is SL3283, and green is SL3228. (C) Pictures of SL3228 cultures after three days of bioreactor growth with increasing IPTG concentration. From left to right: 0  $\mu\text{M}$ , 25  $\mu\text{M}$ , 50  $\mu\text{M}$ , and 100  $\mu\text{M}$  IPTG. (D) Pictures of SL3251 cultures after three days of bioreactor growth with increasing IPTG concentration (same as panel C). All strains were cultured at 38  $^{\circ}\text{C}$  under 500  $\mu\text{E m}^{-2} \text{s}^{-1}$  while bubbling with 5%  $\text{CO}_2$ -supplemented air.

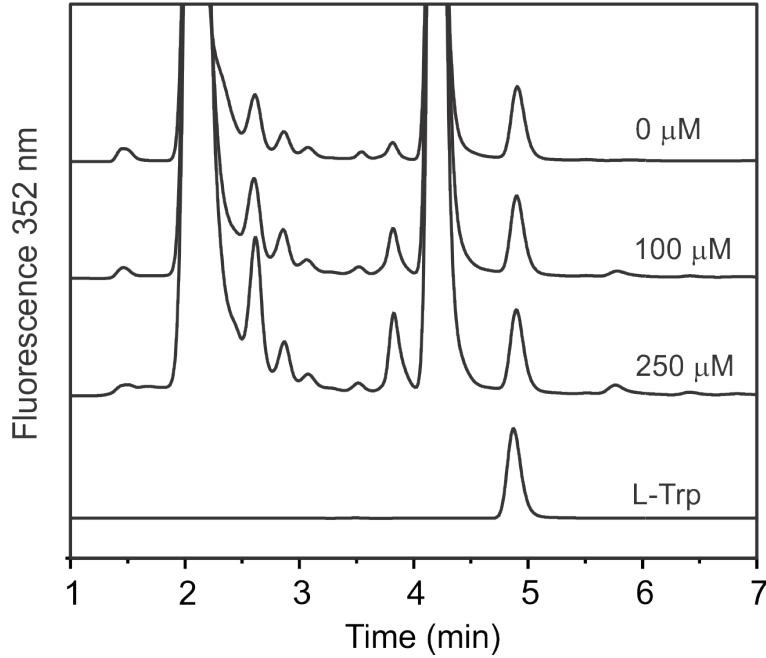

**Figure S5.** *L*-tryptophan content in SL3228 is comparable in uninduced and induced cells. The figure shows HPLC traces of SL3228 lysate from cells induced with 0, 100, and 250  $\mu\text{M}$  IPTG and an *L*-tryptophan standard. Elution was monitored using excitation and detection wavelengths of 287 nm and 352 nm, respectively. The amount of extract loaded for each sample was normalized to dry cell weight.



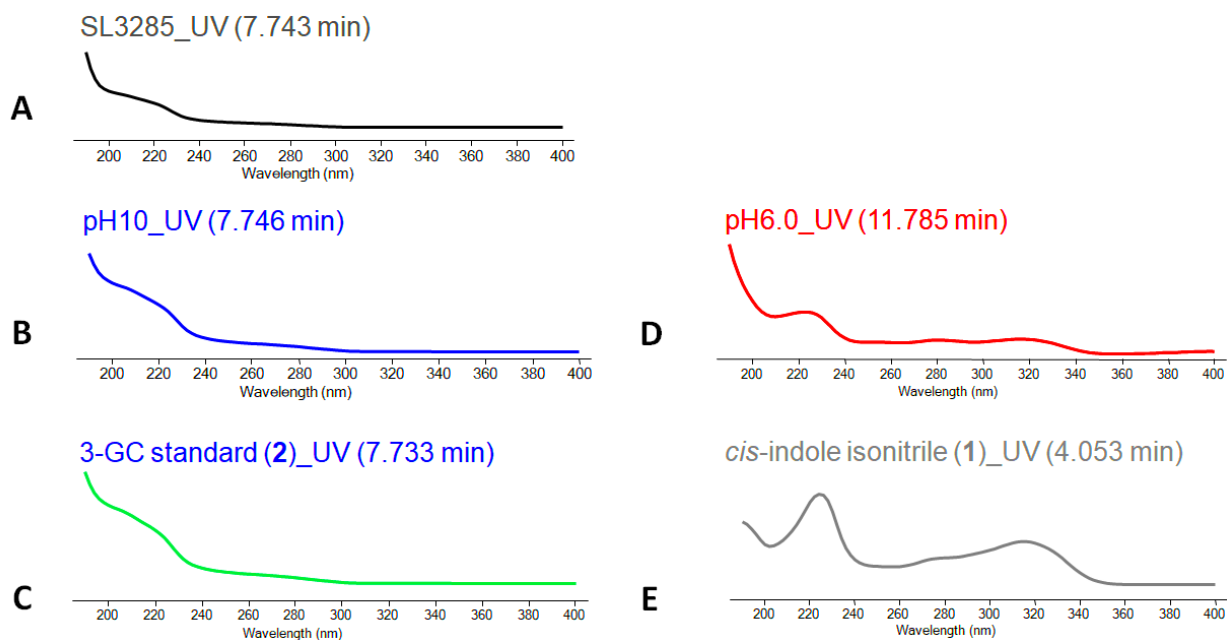

**Figure S6.** Analysis of UV-spectra of C3-geranylated indole-isonitrile (**2**, RT at 7.7 min) and the C2-geranylated isomer (**5**, RT at 11.7 min) obtained by the *in vitro* aromatic prenyltransferase assay using purified FamD2 enzyme. The spectrum of product **2** obtained from SL3285 (A) is compared with the product at pH10.0 (B) and the authentic standard of 3-GC (C). The product peak (RT of 11.7 min) obtained by the chemoenzymatic method at pH 6.0 (D) is corroborated with the intact-ring absorbance of *cis* indole-isonitrile (**1**) (E).

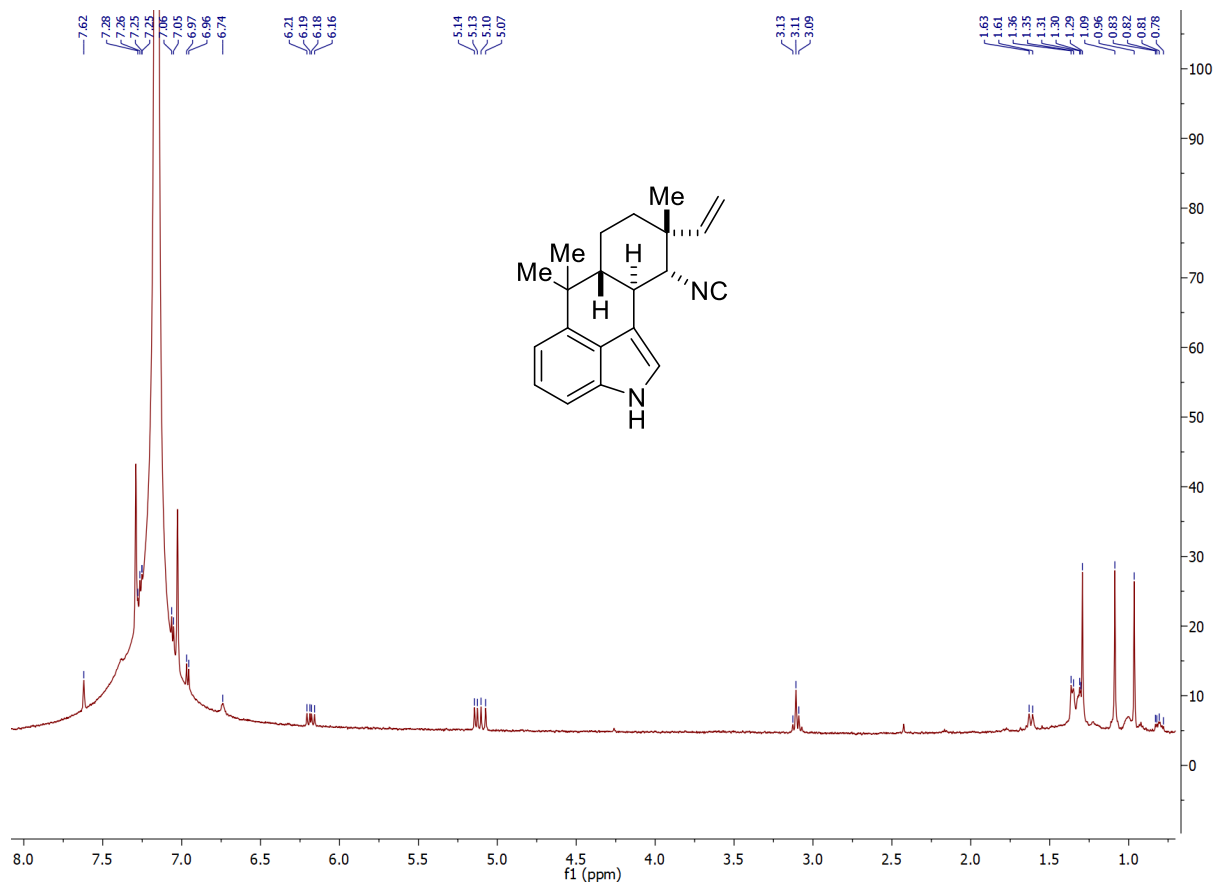

**Figure S7.** <sup>1</sup>H NMR spectrum of hapalindole H (**3**) isolated from strain SL3251.

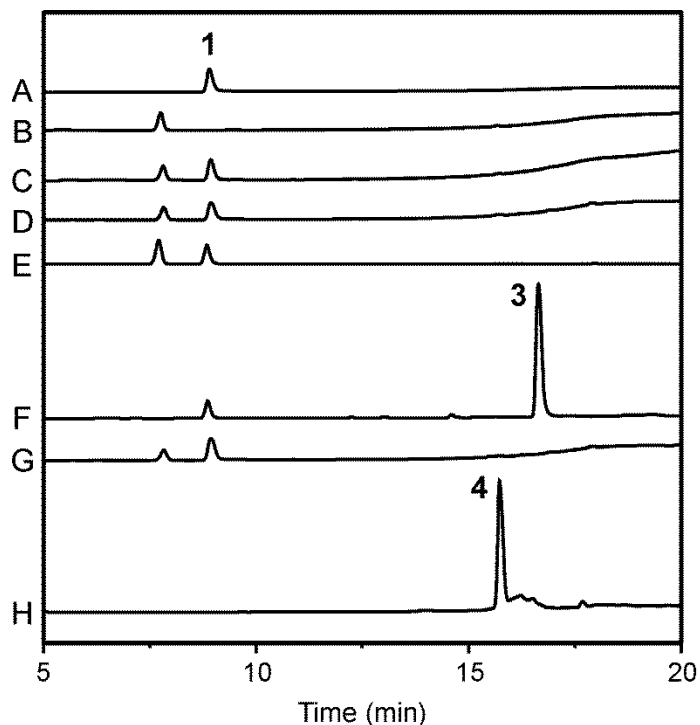

**Figure S8.** *Escherichia coli* is unable to produce hapalindoles but accumulates *cis* indole-isonitrile. The figure shows HPLC traces of organic cell extracts from XL1 Blue *E. coli* hosting the *fam* plasmids cultured in LB media, S2973 strain extracts (“SL”) cultured in BG11 media, and authentic *cis* indole-isonitrile standard monitored at 222 nm. All *E. coli* strains in the figure were induced with 200  $\mu$ M IPTG and S2973 was induced with 50 – 75  $\mu$ M IPTG. (A) authentic *cis* indole-isonitrile (**1**). (B) *E. coli* with pSL3084, a control plasmid. (C) *E. coli* with pSL3228. (D) *E. coli* with pSL3325 ( $P_{lac}$  replacing  $P_{cpcB}$ ). (E) *E. coli* with pSL3251. (F) SL3251, hapalindole H peak is marked (**3**). (G) *E. coli* with pSL3283. (H) SL3283, 12-*epi* hapalindole U peak is marked (**4**). The peak at 7.8 minutes in the *E. coli* extracts is an unknown metabolite not related to the hapalindoles.

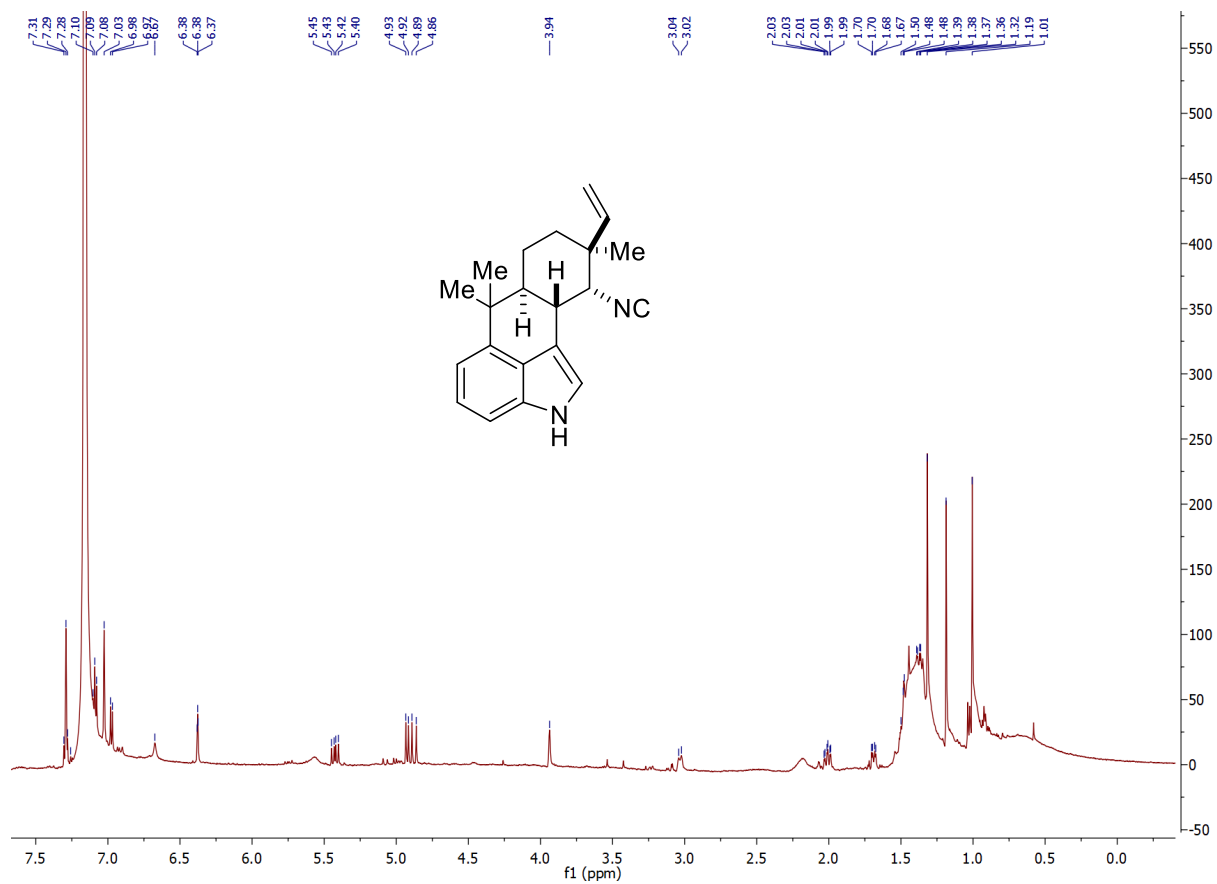

**Figure S9.** <sup>1</sup>H NMR spectrum of 12-*epi* hapalindole U (4) isolated from strain SL3283.

## Supplementary Tables

**Table S1.** Promoter Information.

| Promoter | S2973 Gene ID | S7942 Gene Locus Tag | Gene product/ Notes       | Promoter, 5' UTR and RBS Sequence*                                                                                                                                                                   |
|----------|---------------|----------------------|---------------------------|------------------------------------------------------------------------------------------------------------------------------------------------------------------------------------------------------|
| 0195     | M744_RS01990  | Synpcc7942_0195      | hypothetical protein      | ccacctgcgttcaaccgcattggaagcaatcgccaaggaacactaaaactaaggcctcagcctc<br>cttctcaccgccgctccacttcggagagtcacc                                                                                                |
| 1613     | M744_RS08700  | Synpcc7942_1613      | hypothetical protein      | gaagcgtaacaattcaggaaccgtaattctggcaagctcgcataataatcggtttgccaccccc<br>aatccgct                                                                                                                         |
| 0398     | M744_RS00950  | Synpcc7942_0398      | hypothetical protein      | agggcattcaactgctgagctcgcggggctaccctaagattgtgaagaccttgctgccgagcagg<br>cagtagcctgtcctagcccggcgaggagaacacgcc                                                                                            |
| 1616     | M744_RS08715  | Synpcc7942_1616      | ribonuclease P            | tcacggtcaagccaggccttgacctcgacaccagcagcagtcagttttgcaagaattagaagacc<br>tttaactcgggcgagatcatcc                                                                                                          |
| 1219     | M744_RS10045  | Synpcc7942_1219      | 50S ribosomal protein L21 | gatcgtttgtccacagtttgacagttctcaaaagttctgagatgatagagggctgtgtttaaaggc<br>ggctcggaacaggtttctcaagtgctctctcgcctcggcagggtgtagccacctctacggctgaaa<br>atgc                                                     |
| 1999     | M744_RS06155  | Synpcc7942_1999      | RNA-binding protein       | gtgacgagagtgaataatctggcacttcagtttttaacctgacgtcccagttgctccgctattattg<br>gcgtggtttgtcggcagcgcgcagggtactttggtcgcccatccgaccagcgtctgagaggttca<br>ggttcagagttgcttccgtttcccgaacagtcagttctcgttttaggatacgcgaa |

|      |              |                 |                                                                     |                                                                                                                                                                                                             |
|------|--------------|-----------------|---------------------------------------------------------------------|-------------------------------------------------------------------------------------------------------------------------------------------------------------------------------------------------------------|
| 1987 | M744_RS06215 | Synpcc7942_1987 | hypothetical protein                                                | aagacatctttctcatttcaccttgaacaatcattgcgttttctcagtcctcggattagggatctaggt<br>gggagcatcctgccaaaattccgctgct                                                                                                       |
| 0012 | M744_RS02920 | Synpcc7942_0012 | 30S ribosomal protein S6                                            | gatcgctgagcctcattttcggtaaactaaaagatccttgctcaaactcactgggtaaacaccagctg<br>aagatttgagcccatgaccataaggattggttctg                                                                                                 |
| 0657 | M744_RS12900 | Synpcc7942_0657 | hypothetical protein                                                | gacccaacctgcatctcccctgcgatcgcgggaatactgagcccatcgtaacagccaccgca<br>cagttgacagaaaaaggggatcacgctaaaccaagtcaaaatctaagaggtagccagcaatctt<br>aagaaagtgtaaaattgtgactagcccaggagaacgatc                               |
| 1809 | M744_RS07105 | Synpcc7942_1809 | diflavin flavoprotein A                                             | aaccggctcattcaccagacgcggcgatcgcgtcacaataacaaaacagcgaatttacagcct<br>cggagggattc                                                                                                                              |
| 1479 | M744_RS08030 | Synpcc7942_1479 | cytochrome <i>b<sub>6</sub>f</i> complex<br>subunit 5 PetG          | gtttgaggacgtgtctcagaatgatatacacctttacaattagagggtagcagcagcaatcgcc<br>cctgacctgggctttcggggagctagctcaatcgctacactgcttaagcacctgtattccaagagg<br>cagccaatc                                                         |
| lacZ | -            | -               | <i>E coli</i> lacZ beta-D-<br>galactosidase                         | tagtcactcattaggcaccaggctttacactttatgcttccggctcgtatgtgtgaaattgtgag<br>cggataacaattcacacaggaacagct                                                                                                            |
| 1830 | M744_RS07010 | Synpcc7942_1830 | thioredoxin                                                         | ttaaccactatgaattcttctgcttagcagacagggatcatgagacatccgctatcttagatttaa<br>tgacctgatccaagcaaaggctgaacct                                                                                                          |
| 2486 | -            | Synpcc7942_2486 | hypothetical protein                                                | cggatcaggttgactaaagtccggcagaatagaattagattaaagagaagagggccagacggctc                                                                                                                                           |
| psaA | M744_RS05900 | Synpcc7942_2049 | photosystem I P700<br>chlorophyll <i>a</i> apoprotein<br>A1 (PsaA1) | aagctcttgaattattgtaatcgctcggaggccaaaaaccgccctataatgctcccacagt<br>gctcctcccgtgtggaatcctgcgtcgtgtttttttcagagattgcaggctcctcctaaccctggcg<br>cccaccgctcccctgctgagccaactgcgctatccgggtcatggtgctgttagtctcggagttgccg |

|        |              |                 |                                                                   |                                                                                                         |
|--------|--------------|-----------------|-------------------------------------------------------------------|---------------------------------------------------------------------------------------------------------|
|        |              |                 |                                                                   | aggggggtggccccgagaaatctgaggtcgccacgtgtggctctcagaggaaggaggaggcctca<br>ccctgtctgaagagaggagagtctca         |
| 2352   | M744_RS04355 | Synpcc7942_2352 | sigma 54 modulation<br>protein                                    | atcaataattgtcaacagacacaaaggttcttaacgcactcttctctatcagttacagagtgatagggt<br>gggggtagaaaactgtctgggaggcgattt |
| lacIq  | -            | -               | lacIq is a mutated version<br>of the <i>E. coli</i> lacI promoter | gacaccatcgaatggtgcaaaaccttctcgcggtatggcatgatagcgcccgaagagagtcaattc<br>agggtgggtaatt                     |
| cpcB†  | M744_RS10895 | Synpcc7942_1052 | phycocyanin beta subunit<br>(cpcB)                                | cccgtcagtcagagctcacaatttttagcgaatcttggccgcatcgttgataagaatgccaagg<br>caactggataagggtcaggagactggttga      |
| J23119 | -            | -               | synthetic promoter,<br>Biobrick BBa_J23119                        | aattcttgacagctagctcagtcctaggtataatgctagcatctatactggaagagagtcaattcagg<br>gtgggtaatt                      |
| trc1O  | -            | -               | derivative of synthetic tac<br>promoter                           | ttgacaattaatcatccggctcgataatgtgtggaattgtgagcggataacaattcacacatactag<br>agaaagaggagaaatactag             |

\* 5' UTR, 5' untranslated region. RBS, ribosome binding site.

† truncated version of the natural *cpcB* gene promoter from S2973 and S7942.

**Table S2.** PCR primers and oligos.

| <b>Oligo/Primer Name</b> | <b>Sequence (5' to 3')</b>                           |
|--------------------------|------------------------------------------------------|
| P0012-F                  | tcgaattcagggtaccatcacctgcatcggatcgctgagcctcattttc    |
| P0012-R                  | tgaacagctcctcgcccttgctcaccatcagaaccaatccttatggtc     |
| P0195-F                  | tcgaattcagggtaccatcacctgcatcgccacctgcgttcaacc        |
| P0195-R                  | tgaacagctcctcgcccttgctcaccatgggtgactctccgaagtgg      |
| P0398-F                  | tcgaattcagggtaccatcacctgcatcgagggcattcaactgctgag     |
| P0398-R                  | tgaacagctcctcgcccttgctcaccatggcgtgttctcctcg          |
| P0657-F                  | tcgaattcagggtaccatcacctgcatcggaccccaacctgcatc        |
| P0657-R                  | tgaacagctcctcgcccttgctcaccatgatcgttctcctgggc         |
| P1219-F                  | gaattcagggtaccatcacctgcatcggatcgctttgtccacag         |
| P1219-R                  | aacagctcctcgcccttgctcaccatgcatttcagccgtagag          |
| P1479-F                  | tcgaattcagggtaccatcacctgcatcggttgcaggacgtgtctcag     |
| P1479-R                  | tgaacagctcctcgcccttgctcaccatgattggctgcctcttg         |
| P1613-F                  | tcgaattcagggtaccatcacctgcatcggagcgtaacaattcagga      |
| P1613-R                  | tgaacagctcctcgcccttgctcaccatagcggattgggggt           |
| P1616-F                  | tcgaattcagggtaccatcacctgcatcgtcacggtaagccagg         |
| P1616-R                  | tgaacagctcctcgcccttgctcaccatggatgatctccgcccg         |
| P1809-F                  | tcgaattcagggtaccatcacctgcatcgaaccggctcattcacc        |
| P1809-R                  | tgaacagctcctcgcccttgctcaccatgaatccctccgag            |
| P1830-F                  | accctaacgggtgtttttgttctggtctcccttaaccacttatgaattcttc |
| P1830-R                  | ttacatacatccatagggtcagcctttgcttg                     |
| P1987-F                  | gaattcagggtaccatcacctgcatcgaagacatctttcttcattcacc    |



|           |                                                           |
|-----------|-----------------------------------------------------------|
| P1987-R   | aacagctcctcgcccttgctcacatagcagcggaatttgg                  |
| P1999-F   | gaattcaggtaccatcacctgcatcggtagcagagtgaaataatctg           |
| P1999-R   | aacagctcctcgcccttgctcaccattgctatcctaaagcg                 |
| P2352-F   | gaattcaggtaccatcacctgcatcgatcaataattgtcaacagacaca         |
| P2352-R   | aacagctcctcgcccttgctcaccataaatcgctcccagac                 |
| P2486-F   | tctgcaaggtcgaattcaggtaccatcggatcaggtgactaaagtc            |
| P2486-R   | aaagctttattatcgacatagaccgtctggccctc                       |
| PcpcB-F   | tcgaattcaggtaccatcacctgcatcgcccgtagtcagagcttc             |
| PcpcB-R   | acagctcctcgcccttgctcaccattcaaccagtctcctgaaccttatccagttgcc |
| PJ23119-F | tcgaattcaggtaccatcacctgcatcgaattcttgacagctagctcag         |
| PJ23119-R | tgaacagctcctcgcccttgctcacatattcaccaccctgaattg             |
| Plac-F    | tcgaattcaggtaccatcacctgcatcgtagctcactcattaggcacc          |
| Plac-R    | tgaacagctcctcgcccttgctcacatagctgtttcctgtgtgaaa            |
| Placlq-F  | tcgaattcaggtaccatcacctgcatcggacaccatcgaatggg              |
| Placlq-R  | tgaacagctcctcgcccttgctcacatattcaccaccctgaattg             |
| PpsaA-F   | tcgaattcaggtaccatcacctgcatcgaagctcttgaattattgtaatcg       |
| PpsaA-R   | tgaacagctcctcgcccttgctcaccattgagactctcctctcttcagac        |
| Ptrc-F    | ggcgaattcaggtaccatcacctgcatcgttgacaattaatcatccgg          |
| Ptrc-R    | ggcgaacagctcctcg                                          |
| 3084-1F   | atctagaggatctgtaacaacaagccgccgtcc                         |
| 3084-1R   | ccaccgtaggcatcatgg                                        |
| 3084-2F   | ctggaagctatggctaaccg                                      |
| 3084-2R   | ctttgtgttacagatcctctagatggtacctgaattc                     |

|       |                                                       |
|-------|-------------------------------------------------------|
| CK138 | ctcctgcaaggctgaattcaggtagcatgtctagctttaatgcggtagtt    |
| CK139 | gagcagaagaggctactaggtaggatcaaaaataatc                 |
| CK140 | ttgatcctacctagtagcctcttctgctcctgcag                   |
| CK141 | gagaatTTTTcactaatcatgggtgcacttacctccttagc             |
| CK142 | aagtgaccatgattagtgaaaaaattctcagac                     |
| CK065 | tgactagtactactaactcttgtgtcaaggg                       |
| CK066 | ttgacaacaagagttagtaagtactagtcacaaagcatagg             |
| CK112 | gatgcctggttataaaaatgtaccggtgcaa                       |
| CK113 | aacgggtacatattttataaaccaggcatcaaataaaacg              |
| CK143 | gggacggcggccttgtgttacagatcctgtttaactataaacgcagaaagggc |
| CK170 | cttaataaattaaaaattaaaggtaaataatcatac                  |
| CK171 | attacctttaattttaatttattaagtcattgagcaagagcaaaat        |
| CK073 | cggtgatacctaagattatctaagttgaaattgaggtaag              |
| CK074 | ttcaacttagataatcttaggtatcaacggtttctg                  |
| CK075 | taccgtaccacgaaggagaaatagatgaagcgaatttgattg            |
| CK076 | cttcatctatttctcctcgtgtggtacggtagtaaaattacagccgattcaac |
| CK041 | aggagactggtgaatgttatcaaaattggtgaagg                   |
| CK037 | caatttgataacattcaaccagtctcctgaacc                     |
| CK077 | cgggacggcggccttgtgttacagatccttagcgaatctgtggc          |
| CK217 | tgttccttactaacattcaaccagtctcctgaacctt                 |
| CK172 | gcttgtgttacagatcctgtttgtttaacttagcgaatctgtggc         |
| CK188 | ataagaatgccaaggattatctaagttgaaattgaggtaag             |
| CK189 | tcaacttagataatcccttggcattcttatacaacg                  |

|       |                                                 |
|-------|-------------------------------------------------|
| CK270 | cacaggaaacagctatggtatcaaaattggtgaagg            |
| CK271 | aatttgataacatagctgttcctgtgtgaaattg              |
| CK272 | ggcggcttgggtgtacagatcctgttttagctcactcattaggcacc |

**Table S3.** List of S2973 strains and plasmid genotypes.

| <b>Strain</b> | <b>Strain Genotype</b>                                                                                                                                                  |
|---------------|-------------------------------------------------------------------------------------------------------------------------------------------------------------------------|
| SL3228        | pSL3228[ <i>lacI</i> (W220F), <i>famH1</i> , <i>famH2</i> , <i>famH3</i> , <i>aph3</i> (Kan <sup>R</sup> )]                                                             |
| SL3251        | pSL3251[ <i>lacI</i> (W220F), <i>famH1</i> , <i>famH2</i> , <i>famH3</i> , <i>famE2</i> , <i>famD2</i> , <i>famC2</i> , <i>famC3</i> , <i>aph3</i> (Kan <sup>R</sup> )] |
| SL3285        | pSL3285[ <i>lacI</i> (W220F), <i>famH1</i> , <i>famH2</i> , <i>famH3</i> , <i>famE2</i> , <i>famD2</i> , <i>aph3</i> (Kan <sup>R</sup> )]                               |
| SL3283        | pSL3283[ <i>lacI</i> (W220F), <i>famH1</i> , <i>famH2</i> , <i>famH3</i> , <i>famE2</i> , <i>famD2</i> , <i>famC1</i> , <i>aph3</i> (Kan <sup>R</sup> )]                |

**Table S4.** <sup>1</sup>H NMR shifts for hapalindole H (**3**) produced by strain SL3251 compared to a previous report.

| Li's Reported Spectra <sup>1</sup> (all shifts in ppm, C <sub>6</sub> D <sub>6</sub> ) | Observed Spectra (all shifts in ppm, C <sub>6</sub> D <sub>6</sub> ) |
|----------------------------------------------------------------------------------------|----------------------------------------------------------------------|
| 6.76 (bs) 1H                                                                           | 6.74 (bs) 1H                                                         |
| 7.62 (dd, <i>J</i> =1.4, 2.2 Hz) 1H                                                    | 7.62 (dd, <i>J</i> =1.7 Hz) 1H                                       |
| 7.05 (d, <i>J</i> =7.2 Hz) 1H                                                          | 7.06 (d, <i>J</i> =7.3 Hz) 1H                                        |
| 7.26 (t, <i>J</i> =7.8 Hz) 1H                                                          | 7.27 (t, <i>J</i> =7.7 Hz) 1H                                        |
| 6.96 (d, <i>J</i> =8.0 Hz) 1H                                                          | 6.96 (d, <i>J</i> =8.1 Hz) 1H                                        |
| 3.14-3.06 (m) 1H                                                                       | 3.13-3.07 (m) 1H                                                     |
| 3.12-3.10 (m) 1H                                                                       | 3.11-3.10 (m) 1H                                                     |
| 1.62 (td, <i>J</i> =3.4, 13.8 Hz) 2H                                                   | 1.61 (m) 1H                                                          |
| 0.81 (dt, <i>J</i> =5.6, 12.7 Hz)                                                      | 0.80 (td, <i>J</i> =5.7, 13.2 Hz) 1H                                 |
| 1.35-1.30 (m) 2H                                                                       | 1.36-1.30 (m) 2H                                                     |
| 1.13-1.07 (m) 1H                                                                       | 1.11-1.07 (m) 1H                                                     |
| 0.96 (s) 3H                                                                            | 0.96 (s) 3H                                                          |
| 1.29 (s) 3H                                                                            | 1.29 (s) 3H                                                          |
| 1.09 (s) 3H                                                                            | 1.09 (s) 3H                                                          |
| 6.18 (dd, <i>J</i> =11.1, 17.6 Hz) 1H                                                  | 6.18 (dd, <i>J</i> =11.0, 17.6 Hz) 1H                                |
| 5.14 & 5.09 (dd, <i>J</i> =11.1, 1.3 Hz) 2H                                            | 5.14 (d, <i>J</i> =11.0 Hz) 1H & 5.09 (d, <i>J</i> =17.5 Hz) 1H      |

**Table S5.** <sup>1</sup>H NMR shifts for 12-*epi* hapalindole U (**4**) produced by strain SL3283 compared to a previous report.

| Li's Reported Spectra <sup>2</sup> (all shifts in ppm, C <sub>6</sub> D <sub>6</sub> ) | Observed Spectra (all shifts in ppm, C <sub>6</sub> D <sub>6</sub> ) |
|----------------------------------------------------------------------------------------|----------------------------------------------------------------------|
| 6.67, bs, 1H                                                                           | 6.67, bs, 1H                                                         |
| 6.38, t, ( <i>J</i> =1.9Hz), 1H                                                        | 6.38, t, ( <i>J</i> =1.9Hz), 1H                                      |
| 7.08, d, ( <i>J</i> =7.3Hz), 1H                                                        | 7.08, d, ( <i>J</i> =7.3Hz), 1H                                      |
| 7.29, t, ( <i>J</i> =7.7Hz), 1H                                                        | 7.29, t, ( <i>J</i> =6.7Hz), 1H                                      |
| 6.97, d, ( <i>J</i> =8.2Hz), 1H                                                        | 6.98, d, ( <i>J</i> =8.1Hz), 1H                                      |
| 3.03, d, ( <i>J</i> =11.3Hz), 1H                                                       | 3.03, d, ( <i>J</i> =11.7Hz), 1H                                     |
| 3.94, s, 1H                                                                            | 3.94, s, 1H                                                          |
| 1.69, td, ( <i>J</i> =13.0, 3.9Hz), 1H                                                 | 1.69, td, ( <i>J</i> =13.3, 4.5Hz), 1H                               |
| 1.48, m, 2H                                                                            | 1.49, m, 1 or 2H                                                     |
| 1.37, td, ( <i>J</i> =12.9, 3.8Hz), 1H                                                 | 1.38, td, ( <i>J</i> =12.8, 4.1Hz), 1H                               |
| 2.01, tc, ( <i>J</i> =12.0, 3.5Hz), 1H                                                 | 2.01, td, ( <i>J</i> =11.9, 3.5Hz), 1H                               |
| 1.01, s, 3H                                                                            | 1.01, s, 3H                                                          |
| 1.32, s, 3H                                                                            | 1.32, s, 3H                                                          |
| 5.43, dd, ( <i>J</i> =17.6, 11.0Hz), 1H                                                | 5.43, dd, ( <i>J</i> =17.7, 11.0Hz), 1H                              |
| 4.93, dd, ( <i>J</i> =11.0, 0.6Hz), 1H                                                 | 4.92, dd, ( <i>J</i> =11.0Hz), 1H                                    |
| 4.88, dd, ( <i>J</i> =17.5, 0.6Hz), 1H                                                 | 4.88, dd, ( <i>J</i> =17.7Hz), 1H                                    |
| 1.19, s, 3H                                                                            | 1.19, s, 3H                                                          |

## Supplementary References

- (1) Li, S., Lowell, A. N., Newmister, S. A., Yu, F., Williams, R. M., and Sherman, D. H. (2017) Decoding cyclase-dependent assembly of hapalindole and fischerindole alkaloids. *Nat. Chem. Biol.* 13, 467.
- (2) Li, S., Lowell, A. N., Yu, F., Raveh, A., Newmister, S. A., Bair, N., Schaub, J. M., Williams, R. M., and Sherman, D. H. (2015) Hapalindole/Ambiguine Biogenesis Is Mediated by a Cope Rearrangement, C-C Bond-Forming Cascade. *J. Am. Chem. Soc.* 137, 15366-15369.
